# Supplementary material
Source: PubMed Central journal article supplement (PMC11070063)
Supplement: jama-e243908-s001.pdf [file jama-e243908-s001.pdf]

## Supplemental Online Content

Wolf ER, Rivara FP, Orr CJ, Sen A, Chapman DA, Woolf SH. Racial and ethnic disparities in all-cause and cause-specific mortality among US youth. *JAMA*. Published online May 4, 2024.  
doi:10.1001/jama.2024.3908

**eFigure 1.** Injury and Non-Injury Mortality Rates (per 100,000) of Youth 1-19 Years by Race-Ethnicity

**eFigure 2.** Mortality Rates (Per 100,000) of Youth 1-19 Years for Injury, by Intent

**eTable 1.** Comparison of ICD-10 Codes from CDC WONDER Top 10 Leading Causes of Death for Youth 1-19 and Adapted Categories of Injury and Disease

**eTable 2.** Results of Joinpoint Analyses for Mortality Trends in Youth 1-19, 1999-2020

**eTable 3.** Mortality Ratios and 95% CIs for Various Races and Ethnicities Relative to the non-Hispanic White Population for Youth 1-19 Years

This supplemental material has been provided by the authors to give readers additional information about their work.

**eFigure 1.** Injury and non-injury mortality rates (per 100,000) of youth 1-19 years by race-ethnicity

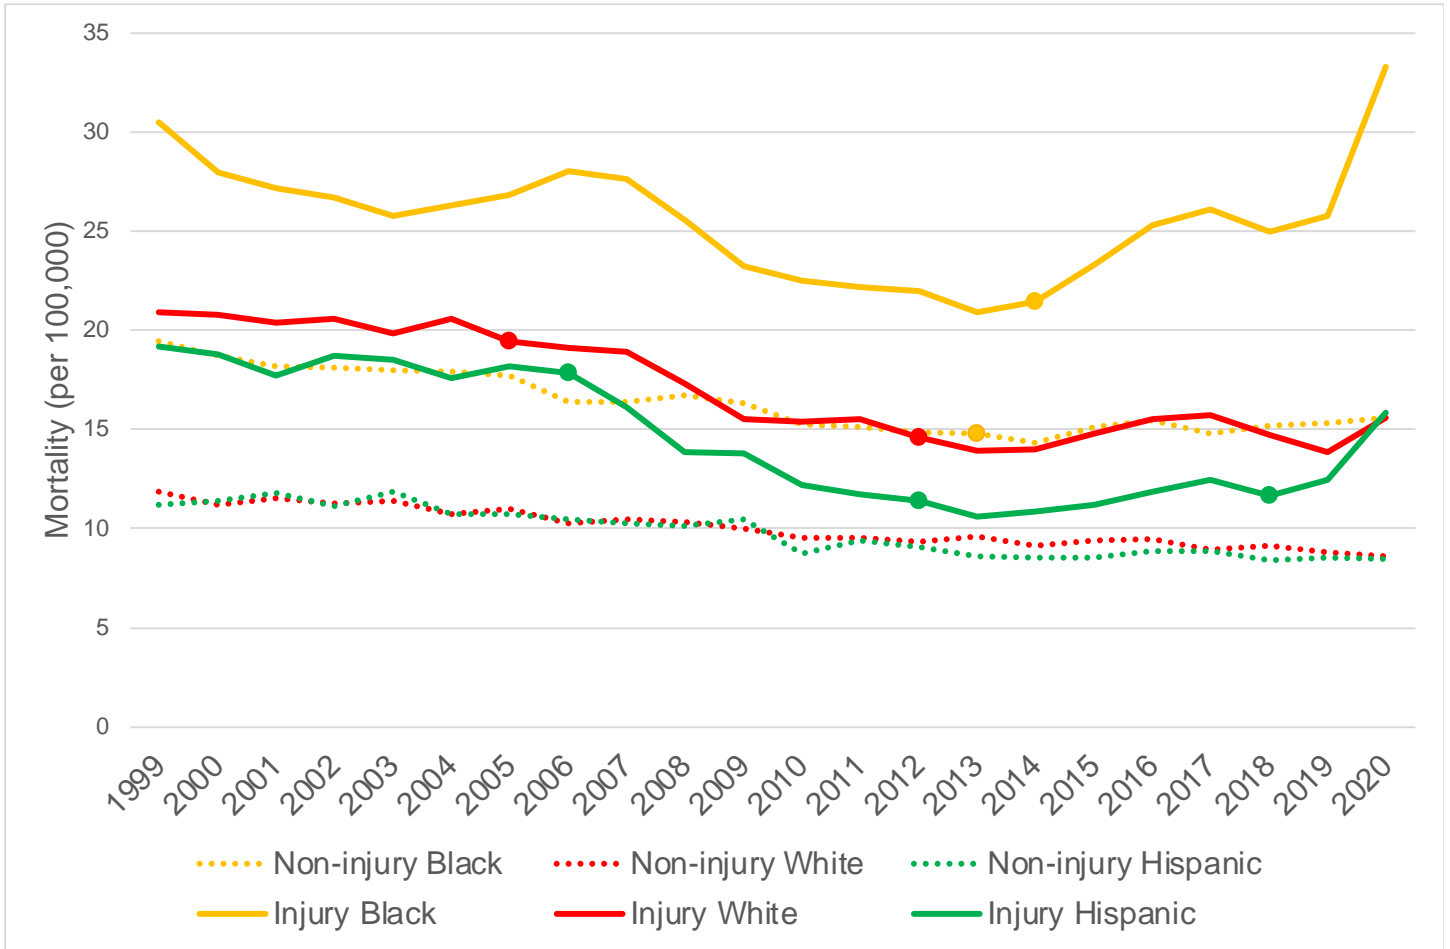

Footnote: Dots represent joinpoint years when the slope changed

**eFigure 2.** Mortality rates (per 100,000) of youth 1-19 years for injury, by intent

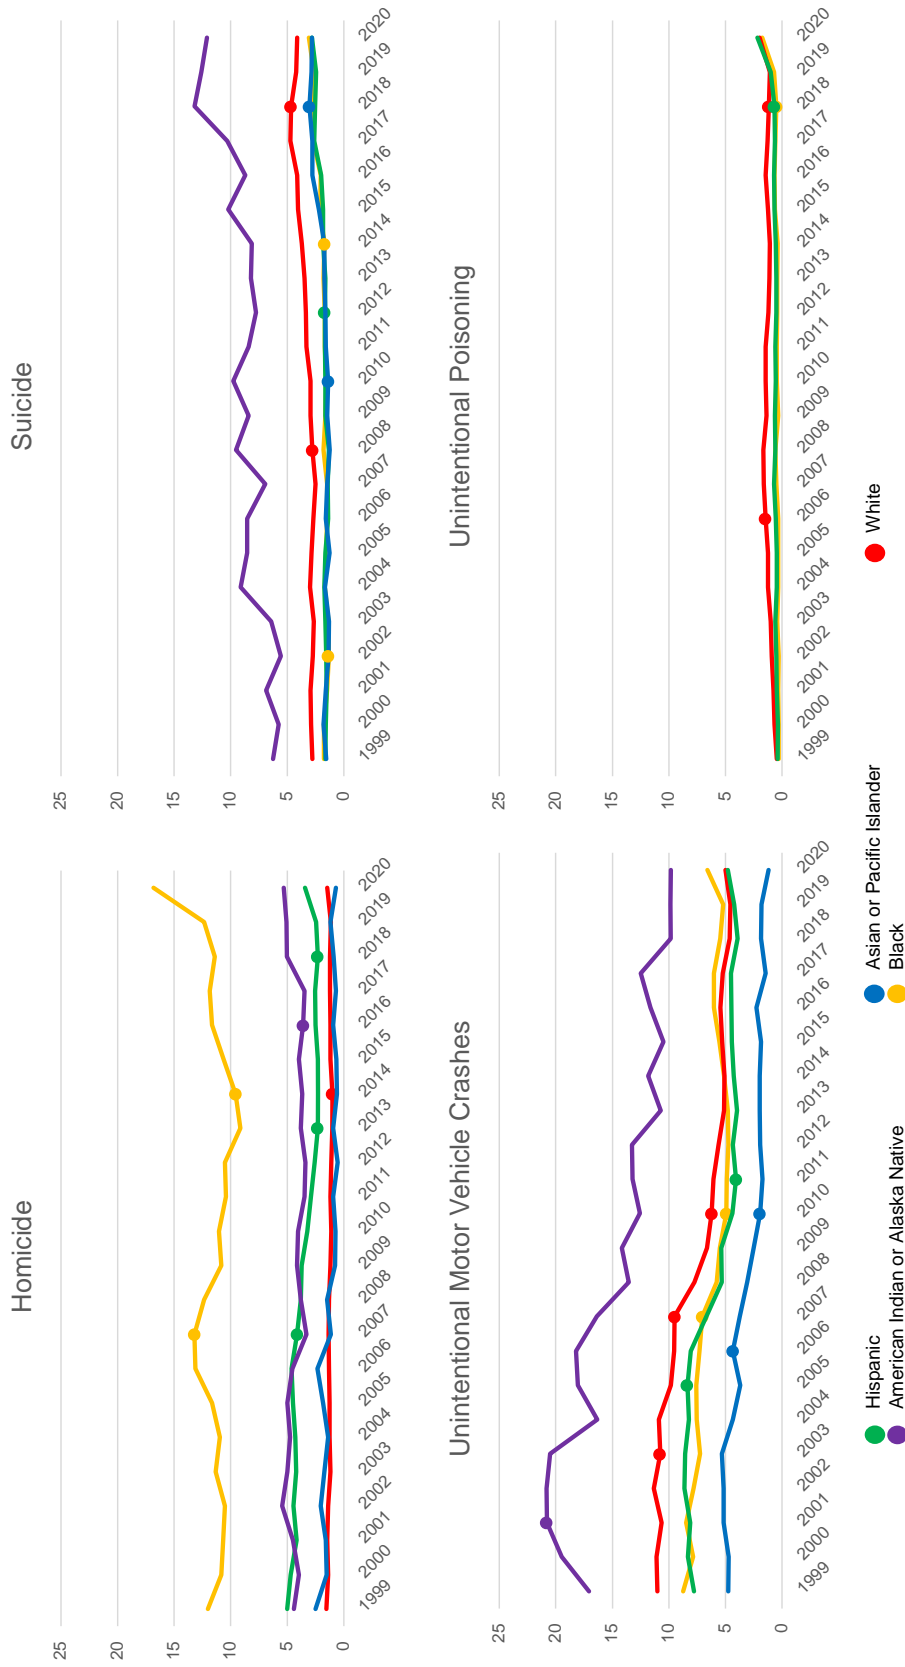

Footnote: Dots represent joinpoint years when the slope changed

**Table 1.** Comparison of ICD-10 codes from CDC WONDER top 10 leading causes of death for youth 1-19 and adapted categories of injury and disease used in this paper. Cells are left blank if no change was made.

| CDC WONDER ranking and category |                                                                       |                            | Categories used in this paper                    |                                                                                                                                                           |                                              |                                                                                                                                                                          |
|---------------------------------|-----------------------------------------------------------------------|----------------------------|--------------------------------------------------|-----------------------------------------------------------------------------------------------------------------------------------------------------------|----------------------------------------------|--------------------------------------------------------------------------------------------------------------------------------------------------------------------------|
|                                 |                                                                       |                            | Unintentional injury or disease                  |                                                                                                                                                           | Injury by mechanism                          |                                                                                                                                                                          |
| 1                               | Accidents (Unintentional injuries)                                    | V01-X59, Y85-Y86           | Unintentional Motor Vehicle Crashes <sup>a</sup> | V02-V04; V09.0; V09.2; V12-V14; V19.0-V19.2; V19.4-V19.6; V20-V79; V80.3-V80.5; V81.0-V81.1; V82.0-V82.1; V83-V86; V87.0-V87.8; V88.0-V88.8; V89.0; V89.2 | Motor Vehicle Crashes <sup>a,b</sup>         | V02-V04; V09.0; V09.2; V12-V14; V19.0-V19.2; V19.4-V19.6; V20-V79; V80.3-V80.5; V81.0-V81.1; V82.0-V82.1; V83-V86; V87.0-V87.8; V88.0-V88.8; V89.0; V89.2; X82; Y03; Y32 |
|                                 |                                                                       |                            | Unintentional Poisoning <sup>c</sup>             | X40-49                                                                                                                                                    | Drug-related <sup>d</sup>                    | X40-44; X60-64; X85; Y10-14                                                                                                                                              |
|                                 |                                                                       |                            | Unintentional Drowning                           | W65-74                                                                                                                                                    | Drowning <sup>e</sup>                        | W65-74, X71, X92, Y21                                                                                                                                                    |
|                                 |                                                                       |                            | Unintentional Suffocation                        | W75-84                                                                                                                                                    | Suffocation <sup>f</sup>                     | W75-84, X70, X91, Y20                                                                                                                                                    |
|                                 |                                                                       |                            | Unintentional Fire/Burn <sup>g</sup>             | X00-19                                                                                                                                                    | Fire/Burn <sup>g,h</sup>                     | X00-19, X76-77, X97-98, Y26-27, Y36.3, U01.3                                                                                                                             |
|                                 |                                                                       |                            |                                                  | Firearm <sup>i</sup>                                                                                                                                      | W32-34, X72-74, X93-95, Y22-24, Y35.0, U01.4 |                                                                                                                                                                          |
| 2                               | Assault (Homicide) <sup>j</sup>                                       | U01-U02, X85-Y09, Y87.1    |                                                  |                                                                                                                                                           |                                              |                                                                                                                                                                          |
| 3                               | Intentional self-harm (Suicide)                                       | U03, X60-X84, Y87.0        |                                                  |                                                                                                                                                           |                                              |                                                                                                                                                                          |
| 4                               | Malignant neoplasms (Cancer)                                          | C00-C97                    |                                                  |                                                                                                                                                           |                                              |                                                                                                                                                                          |
| 5                               | Congenital malformations, deformations, and chromosomal abnormalities | Q00-Q99                    |                                                  |                                                                                                                                                           |                                              |                                                                                                                                                                          |
| 6                               | Diseases of heart                                                     | I00-I09, I11, I13, I20-I51 | Circulatory Diseases                             | I00-99                                                                                                                                                    |                                              |                                                                                                                                                                          |
| 9                               | Cerebrovascular diseases                                              | I60-I69                    |                                                  |                                                                                                                                                           |                                              |                                                                                                                                                                          |
| 7                               | Influenza and pneumonia                                               | J09-J18                    |                                                  |                                                                                                                                                           |                                              |                                                                                                                                                                          |
| 8                               | Chronic lower respiratory diseases                                    | J40-J47                    | Asthma                                           | J45-J46                                                                                                                                                   |                                              |                                                                                                                                                                          |
| 10                              | Septicemia                                                            | A40-A41                    | Other infection                                  | A00-B99                                                                                                                                                   |                                              |                                                                                                                                                                          |
|                                 |                                                                       |                            | COVID-19                                         | U07.1                                                                                                                                                     |                                              |                                                                                                                                                                          |

<sup>a</sup> Includes any motor vehicle crash fatality involving drivers, occupants, pedestrians, or pedal cyclists.  
<sup>b</sup> Includes vehicular homicide, suicide, and crashes of undetermined intent.  
<sup>c</sup> Includes poisoning by drugs, alcohol, solvents, gases, and pesticides.  
<sup>d</sup> Includes illicit, prescribed, and over the counter drugs. Includes unintentional poisoning, intentional self-poisoning, assault by drugs, and events of undetermined intent.  
<sup>e</sup> Includes intentional self-harm and assault by drowning and submersion.  
<sup>f</sup> Includes self-harm and assault by hanging, strangulation, and suffocation.  
<sup>g</sup> Includes exposure to fire, smoke, and hot substances.  
<sup>h</sup> Includes intentional self-harm and assault by fire, smoke, and hot substances.  
<sup>i</sup> Includes firearm injuries that were unintentional, intentional, and of undetermined intent.  
<sup>j</sup> Includes death by firearm, assault by bodily force, terrorism, maltreatment, and neglect.

| <b>eTable 2.</b> Results of Joinpoint analyses for mortality trends in youth 1-19, 1999-2020. |                                     |                                     |                                                  |                                     |                                   |
|-----------------------------------------------------------------------------------------------|-------------------------------------|-------------------------------------|--------------------------------------------------|-------------------------------------|-----------------------------------|
| <b>Cause of Death</b>                                                                         | <b>Race or Ethnicity</b>            | <b>Years</b>                        | <b>Slope (annual percent change)</b>             | <b>Change in slope</b>              |                                   |
| <b>All Cause</b>                                                                              | All races and ethnicities           | 1999-2006                           | -1.30*                                           | NA                                  |                                   |
|                                                                                               |                                     | 2006-2012                           | -4.41*                                           | -0.03**                             |                                   |
|                                                                                               |                                     | 2012-2020                           | 1.19*                                            | 0.06**                              |                                   |
|                                                                                               | American Indian or Alaska Native    | 1999-2002                           | 4.43*                                            | NA                                  |                                   |
|                                                                                               |                                     | 2002-2010                           | -1.68*                                           | -0.06**                             |                                   |
|                                                                                               |                                     | 2010-2013<br>2013-2020              | -5.70<br>3.01*                                   | -0.04<br>0.09                       |                                   |
| Asian or Pacific Islander                                                                     | 1999-2011<br>2011-2020              | -4.02*<br>0.64                      | NA<br>0.05**                                     |                                     |                                   |
| Black                                                                                         | 1999-2014<br>2014-2020              | -2.00*<br>4.12*                     | NA<br>0.06**                                     |                                     |                                   |
| Hispanic                                                                                      | 1999-2005<br>2005-2013<br>2013-2020 | -0.67<br>-5.26*<br>2.66*            | NA<br>-0.05**<br>0.08**                          |                                     |                                   |
| White                                                                                         | 1999-2007<br>2007-2010<br>2010-2020 | -1.36*<br>-6.07*<br>-0.26           | NA<br>-0.05<br>0.06                              |                                     |                                   |
| <b>All injury</b>                                                                             | American Indian or Alaska Native    | 1999-2005<br>2005-2014<br>2014-2020 | 0.75<br>-3.22*<br>3.41*                          | NA<br>-0.04**<br>0.07**             |                                   |
|                                                                                               |                                     | Asian or Pacific Islander           | 1999-2006<br>2006-2010<br>2010-2020              | -2.03<br>-12.94*<br>2.63*           | NA<br>-0.12**<br>0.16**           |
|                                                                                               |                                     |                                     | Black                                            | 1999-2014<br>2014-2020              | -2.09*<br>5.95*                   |
|                                                                                               | Hispanic                            |                                     | 1999-2006<br>2006-2012<br>2012-2018<br>2018-2020 | -1.18<br>-7.78*<br>1.69<br>13.64*   | NA<br>-0.07**<br>0.10**<br>0.11** |
|                                                                                               |                                     | White                               | 1999-2005<br>2005-2012<br>2012-2020              | -0.77<br>-4.61*<br>0.75             | NA<br>-0.04**<br>0.05**           |
| <b>Firearm</b>                                                                                | American Indian or Alaska Native    | 1999-2013<br>2013-2020              | -2.41*<br>9.74*                                  | NA<br>0.12**                        |                                   |
|                                                                                               |                                     | Asian or Pacific Islander           | 1999-2001<br>2001-2006<br>2006-2009<br>2009-2020 | -23.05<br>5.94<br>-31.11<br>9.12    | NA<br>0.32<br>-0.43<br>0.46       |
|                                                                                               | Black                               |                                     | 1999-2002<br>2002-2007<br>2007-2013<br>2013-2020 | -5.92<br>5.96<br>-5.97<br>9.40*     | NA<br>0.12<br>-0.12**<br>0.15**   |
|                                                                                               |                                     |                                     | Hispanic                                         | 1999-2006<br>2006-2014<br>2014-2020 | -1.60<br>-7.70*<br>9.96*          |
|                                                                                               | White                               | 1999-2007<br>2007-2020              |                                                  | -3.89*<br>4.17*                     | NA<br>0.08**                      |
|                                                                                               | <b>Motor vehicle crashes</b>        | American Indian or Alaska Native    | 1999-2001<br>2001-2020                           | 9.04<br>-4.19*                      | NA<br>-0.13                       |
| Asian or Pacific Islander                                                                     |                                     |                                     | 1999-2006<br>2006-2010<br>2010-2020              | -2.49<br>-16.73*<br>-2.30           | NA<br>-0.16<br>0.16               |
|                                                                                               |                                     | Black                               | 1999-2007<br>2007-2010<br>2010-2020              | -2.43<br>-12.17*<br>2.64*           | NA<br>-0.11<br>0.16               |
|                                                                                               |                                     |                                     | Hispanic                                         | 1999-2005<br>2005-2011<br>2011-2020 | 0.97<br>-11.67*<br>1.23           |
| White                                                                                         |                                     | 1999-2007<br>2007-2010<br>2010-2020 |                                                  | -2.24<br>-14.94*<br>-2.08           | NA<br>-0.14<br>0.14               |

| Cause of Death                      | Race or Ethnicity                | Years                                            | Slope (annual percent change)     | Change in slope                   |
|-------------------------------------|----------------------------------|--------------------------------------------------|-----------------------------------|-----------------------------------|
| Drug-related                        | Black                            | 1999-2018<br>2018-2020                           | 2.94*<br>71.93*                   | NA<br>0.51**                      |
|                                     | Hispanic                         | 1999-2018<br>2018-2020                           | 1.77*<br>79.19*                   | NA<br>0.57**                      |
|                                     | White                            | 1999-2006<br>2006-2018<br>2018-2020              | 16.17*<br>-2.78*<br>27.14*        | NA<br>-0.18**<br>0.27             |
| Homicide                            | American Indian or Alaska Native | 1999-2016<br>2016-2020                           | -1.83*<br>11.97*                  | NA<br>0.13**                      |
|                                     | Asian or Pacific Islander        | 1999-2020                                        | -5.17*                            | NA                                |
|                                     | Black                            | 1999-2007<br>2007-2014<br>2014-2020              | 1.92*<br>-4.07*<br>8.29*          | NA<br>-0.06**<br>0.12**           |
|                                     | Hispanic                         | 1999-2007<br>2007-2013<br>2013-2018<br>2018-2020 | -1.06<br>-9.45<br>-0.10<br>18.50* | NA<br>-0.09**<br>0.10**<br>0.17** |
|                                     | White                            | 1999-2014<br>2014-2020                           | -2.10*<br>4.04*                   | NA<br>0.06**                      |
| Suicide                             | American Indian or Alaska Native | 1999-2020                                        | 3.09*                             | NA                                |
|                                     | Asian or Pacific Islander        | 1999-2010<br>2010-2018<br>2018-2020              | -1.74<br>10.86<br>-4.10           | NA<br>0.12**<br>-0.15             |
|                                     | Black                            | 1999-2002<br>2002-2014<br>2014-2020              | -7.73<br>2.13<br>9.55*            | NA<br>0.10<br>0.07**              |
|                                     | Hispanic                         | 1999-2012<br>2012-2020                           | 0.03<br>7.63*                     | NA<br>0.07**                      |
|                                     | White                            | 1999-2008<br>2008-2018<br>2018-2020              | -0.74<br>5.78*<br>-7.50           | NA<br>0.06**<br>-0.13**           |
| Unintentional Motor Vehicle Crashes | American Indian or Alaska Native | 1999-2001<br>2001-2020                           | 9.55<br>-4.17*                    | NA<br>-0.13                       |
|                                     | Asian or Pacific Islander        | 1999-2006<br>2006-2010<br>2010-2020              | -2.41<br>-16.81*<br>-2.33         | NA<br>-0.16<br>0.16               |
|                                     | Black                            | 1999-2007<br>2007-2010<br>2010-2020              | -2.42<br>-12.25*<br>2.62*         | NA<br>-0.11<br>0.16               |
|                                     | Hispanic                         | 1999-2005<br>2005-2011<br>2011-2020              | 1.03<br>-11.71*<br>1.21           | NA<br>-0.13**<br>0.14**           |
|                                     | White                            | 1999-2003<br>2003-2007<br>2007-2010<br>2010-2020 | 0.03<br>-4.38<br>-13.78<br>-2.21  | NA<br>-0.05<br>-0.10<br>0.13      |
| Unintentional Poisoning             | Black                            | 1999-2018<br>2018-2020                           | 2.94*<br>71.93*                   | NA<br>0.51**                      |
|                                     | Hispanic                         | 1999-2018<br>2018-2020                           | 1.77*<br>79.19*                   | NA<br>0.57**                      |
|                                     | White                            | 1999-2006<br>2006-2018<br>2018-2020              | 16.17*<br>-2.78*<br>27.14*        | NA<br>-0.18**<br>0.27             |

\* Indicates that slope (annual percent change) was significantly different from zero (p<.05)

\*\* Indicates that the change in slope was significantly different from prior slope (p<.05)

**eTable 3.** Mortality ratios and 95% CIs for various races and ethnicities relative to the non-Hispanic White population for youth 1-19 years

|                         |               |                          | American Indian or Alaska Native: White | Asian or Pacific Islander: White | Black: White               | Hispanic: White          |
|-------------------------|---------------|--------------------------|-----------------------------------------|----------------------------------|----------------------------|--------------------------|
| All-cause               |               |                          | <b>2.03 (1.93, 2.12)</b>                | <b>0.63 (0.61, 0.66)</b>         | <b>1.76 (1.73, 1.79)</b>   | <b>0.89 (0.88, 0.91)</b> |
| All Injury              |               |                          | <b>2.30 (2.17, 2.43)</b>                | <b>0.49 (0.47, 0.52)</b>         | <b>1.79 (1.76, 1.83)</b>   | <b>0.85 (0.93, 0.87)</b> |
| Injury                  | Mechanism     | Firearm                  | <b>2.14 (1.88, 2.43)</b>                | <b>0.45 (0.40, 0.50)</b>         | <b>4.14 (4.00, 4.28)</b>   | 0.99 (0.95, 1.03)        |
|                         |               | Motor Vehicle Crashes    | <b>2.14 (1.93, 2.36)</b>                | <b>0.34 (0.31, 0.38)</b>         | <b>1.17 (1.13, 1.23)</b>   | <b>0.88 (0.85, 0.91)</b> |
|                         |               | Drug-related             | <b>1.50 (1.21, 1.84)</b>                | <b>0.35 (0.29, 0.41)</b>         | <b>0.67 (0.61, 0.73)</b>   | <b>0.68 (0.64, 0.73)</b> |
|                         |               | Drowning                 | <b>1.52 (1.17, 1.95)</b>                | <b>0.78 (0.68, 0.90)</b>         | <b>1.74 (1.62, 1.87)</b>   | <b>0.82 (0.75, 0.88)</b> |
|                         |               | Suffocation              | <b>3.71 (3.28, 4.17)</b>                | <b>0.81 (0.72, 0.89)</b>         | <b>0.84 (0.78, 0.90)</b>   | <b>0.75 (0.71, 0.80)</b> |
|                         |               | Fire/Burn                | <b>1.68 (1.09, 2.47)</b>                |                                  | <b>1.95 (1.74, 2.19)</b>   | <b>0.57 (0.49, 0.66)</b> |
|                         | Intentional   | Homicide                 | <b>3.57 (3.05, 4.17)</b>                | <b>0.70 (0.61, 0.81)</b>         | <b>10.20 (9.75, 10.66)</b> | <b>2.11 (1.99, 2.22)</b> |
|                         |               | Suicide                  | <b>2.60 (2.35, 2.86)</b>                | <b>0.65 (0.60, 0.71)</b>         | <b>0.60 (0.57, 0.64)</b>   | <b>0.57 (0.54, 0.60)</b> |
|                         | Unintentional | Motor Vehicle Crashes    | <b>2.15 (1.95, 2.34)</b>                | <b>0.34 (0.31, 0.38)</b>         | <b>1.17 (1.13, 1.22)</b>   | <b>0.88 (0.85, 0.91)</b> |
|                         |               | Poisoning                | <b>1.56 (1.24, 1.94)</b>                | <b>0.29 (0.23, 0.36)</b>         | <b>0.61 (0.55, 0.67)</b>   | <b>0.76 (0.70, 0.81)</b> |
|                         |               | Drowning                 | <b>1.44 (1.09, 1.86)</b>                | <b>0.73 (0.63, 0.85)</b>         | <b>1.70 (1.58, 1.83)</b>   | <b>0.81 (0.75, 0.88)</b> |
|                         |               | Suffocation              |                                         | <b>0.57 (0.40, 0.78)</b>         | <b>1.49 (1.29, 1.73)</b>   | <b>0.74 (0.63, 0.87)</b> |
|                         |               | Fire/Burn                |                                         |                                  | <b>1.81 (1.59, 2.05)</b>   | <b>0.59 (0.50, 0.69)</b> |
|                         | Disease       | Cancer                   |                                         | 1.15 (0.93, 1.40)                | 0.94 (0.86, 1.04)          | <b>1.07 (1.01, 1.14)</b> |
| Congenital Anomalies    |               | <b>1.56 (1.21, 1.98)</b> | <b>0.77 (0.67, 0.89)</b>                | <b>1.54 (1.43, 1.66)</b>         | 0.94 (0.88, 1.01)          |                          |
| Circulatory Diseases    |               | <b>1.50 (1.13, 1.96)</b> | 0.94 (0.81, 1.08)                       | <b>2.18 (2.03, 2.35)</b>         | <b>0.87 (0.80, 0.95)</b>   |                          |
| Asthma                  |               |                          | <b>0.61 (0.37, 0.96)</b>                | <b>7.80 (6.78, 8.99)</b>         | 1.04 (0.84, 1.27)          |                          |
| Influenza and pneumonia |               | <b>3.11 (2.20, 4.28)</b> | 1.05 (0.82, 1.32)                       | <b>1.58 (1.37, 1.80)</b>         | 0.89 (0.77, 1.02)          |                          |
| COVID-19                |               |                          | 0.78 (0.48, 1.21)                       | <b>2.70 (2.23, 3.27)</b>         | <b>1.69 (1.40, 2.03)</b>   |                          |
| Other Infection         |               | <b>2.55 (1.84, 3.44)</b> | <b>1.29 (1.07, 1.55)</b>                | <b>1.53 (1.36, 1.72)</b>         | <b>1.14 (1.02, 1.27)</b>   |                          |

Bolded ratios are statistically significant (p<.05)  
Data are from 2016-2020 except COVID-19 that includes data from 2020-2021
