# Supplementary material
Source: PubMed Central journal article supplement (PMC11070063)
Supplement: jama-e243908-s002.pdf [file jama-e243908-s002.pdf]

## Data Sharing Statement

Wolf. Racial and Ethnic Disparities in All-Cause and Cause-Specific Mortality Among US Youth. *JAMA*. Published May 04, 2024. doi:10.1001/jama.2024.3908

### Data

**Data available:** Yes

**Data types:** Deidentified participant data

**How to access data:** Data is publicly available from CDC WONDER

**When available:** With publication

### Supporting Documents

**Document types:** None

### Additional Information

**Who can access the data:** Data is available to the public through the CDC website

**Types of analyses:** These data are available to anyone conducting public health research

**Mechanisms of data availability:** Through CDC WONDER website
